# Supplementary material for: Prevalence of plasma autoantibody against cancer testis antigen NY-ESO-1 in HTLV-1 infected individuals with different clinical status
Source: Springer Nature journal article supplement (doi:10.1186/s12985-017-0802-9), 2017-07-17

**A** Sequence of NY-ESO-1 gene (NCBI Reference Sequence: NC\_000023.11)

```

ATCCTCGTGGGCCCTGACCTTCTCTCTGAGAGCCGGGCAGAGGCTCCGGAGCCATGCGAGGCCAGGGCCG
GGGCACAGGGGGTTTCACGGGCGATGCTGATGGCCAGGAGGCCCTGGCATTCCTGATGGCCAGGGGGC
AATGCTGGCGGCCAGGAGAGGCGGGTCCACGGGCGGAGAGGTCCTCCGGGGCCAGGGGCAGCAAGGG
CCTCGGGCCGGGAGGAGGCCCGCCCGGGTCCGCATGGCGGGCGGGCTTCAGGGCTGAATGGATGCTG
CAGATGCGGGGCCAGGGGGCCGAGAGCCCGCTGCTTGAGTGTGATTCTGTTCTGTTCTGTTCTGTTCTG
TTCTGACAGTTCTGGTGGCAGGTGGGGCCGGGAGATGGGGAGGGCAGGGCCAGGTGGGGAGGAGGGCG
GGGAGATGCCAGTAAGTGGTTGGGTGGGGTGGGGTGGGGTGGGGTGGGAGTGGGGATATGAGAGCCAG
CTGCAGGAGGGGAGGAGGTAAGGGCTGGGAGGTAGAGGGGTGGGGTGGGGGAGAGGGGCTGGGTGAT
TGGGTGAGGGGCACCGGGTATGCGGGGAGGGGAGCAGGGCCAGGAGATAGGGGGACCCAGTGTAGGA
GGGATCAGGAGGTGGGGGAAGGGGCAAGATGGGAGCGGGTGGCGGAGGTGTTGGGATGGAGGGTC
GAGTGTAGGAGGGGCCCGGGTATGCCACAGGGGCGAGGTGGGGAGGGTCTTGTAAAGGCATGGAG
GAGTCAGCTTGGGGTGCAGCAAAGGAAAGTGGGGAACCAAGACAGCTGGGTGGGGTGTGCTACTGGGCCA
GTGCTGGGGAGACAGCCTGGGGGGATGGGCTGGGCAATCCGGGTAGGGGGAGGGGTGGGGAGTGG
GGGAGGGGAAGCTGGCTGGGTAAGCAGCAGGCCGAGCCACAGGCCAAGTCTAGGAGAGGATGCCT
TAACTGGGCCCCACCAGCTACTCGCCATGCTTTCCGGCACCCCATGGAAGCAGAGCTGGCCCGCAGG
AGCCTGGCCAGGATGCCACCGCTTCCCGTGCCAGGGGTGCTTCTGAAGGAGTTCACTGTGTCGGCA
ACATACTGACTATGTCAGTTTCAGGACCAGGACAGGGATGGGGCTGGGTGGGTGGCGGTACAGCGTGGC
AGGGTGGGGGTGGGATCCGCCTACACCCACGGTCAAGCTGTAGAACTGGGAACACCCAGCACAG
GGTCTCAGAACAGAGACCTGGTACACCAGGCCCGCCGCCACCCGAGGGAGCCAGGGAGATGGGTGAGA
GGTGTGCGCTTAACTGTATGTTCTGCCCCACATTTAGCCGACTGACTGCTGCAGACCCCGCCAA
CTGCAGCTCTCCATCAGCTCCTGTCTCCAGCAGCTTTCCTGTGTGATGTGGATCACGAGTGTCTTCTGC
CCGTGTTTTTGGCTCAGCCTCCCTCAGGGCAGAGGCGCTAAGCCAGCCTGGCGCCCTTCTTAGGTGAT
GCCTCCTCCCTAGGAAATGGTCCCAGCACGAGTGGCCAGTTCATTGTGGGGCCTGATTGTTTGTGCTG
GGAGGAGACGGCTTACATGTTTGTCTGTAGAAAATAAACTGAGCTACGA
    
```

Exon1

Exon2

Exon3

**B** Scheme of construction of pET-14b-NY-ESO-1 plasmid

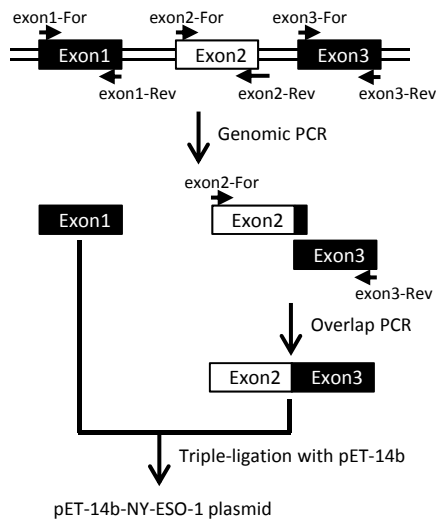

**C** Amplification of DNA fragments of exons

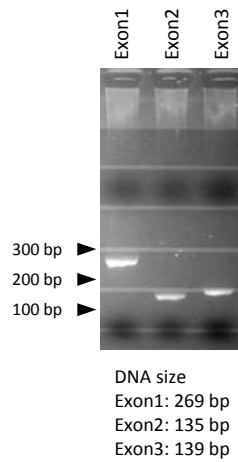

**D** Purification of His-NY-ESO-1 protein

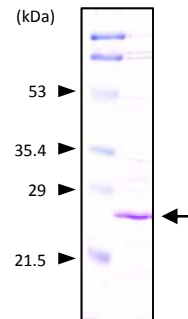

Supplement: MOESM1 [file 13310042]
