# Supplementary material for: Prevalence of plasma autoantibody against cancer testis antigen NY-ESO-1 in HTLV-1 infected individuals with different clinical status
Source: Springer Nature journal article supplement (doi:10.1186/s12985-017-0802-9), 2017-07-17
Supplement: MOESM2 [file 13310042]

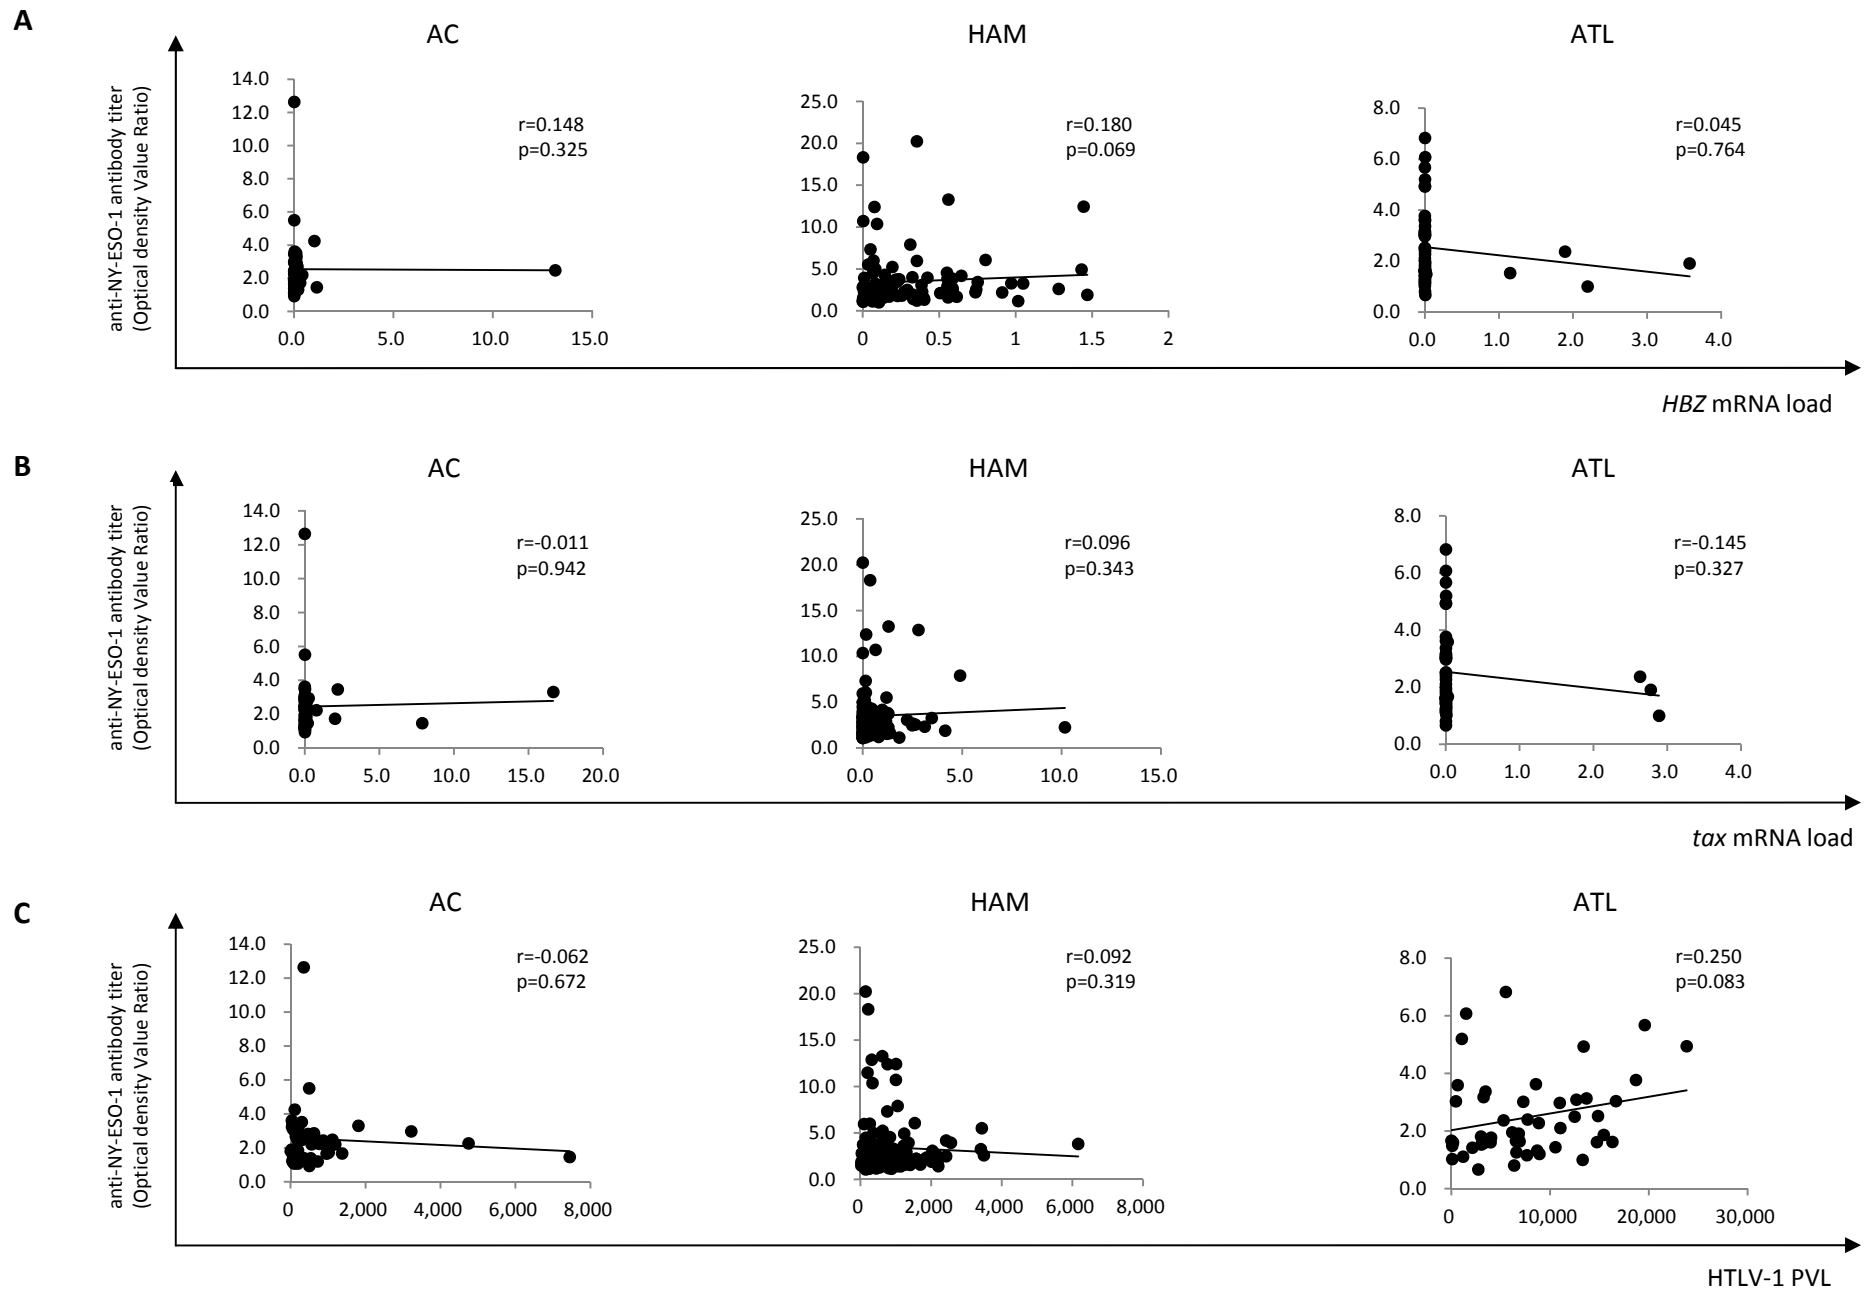

Supplementary Figure 2

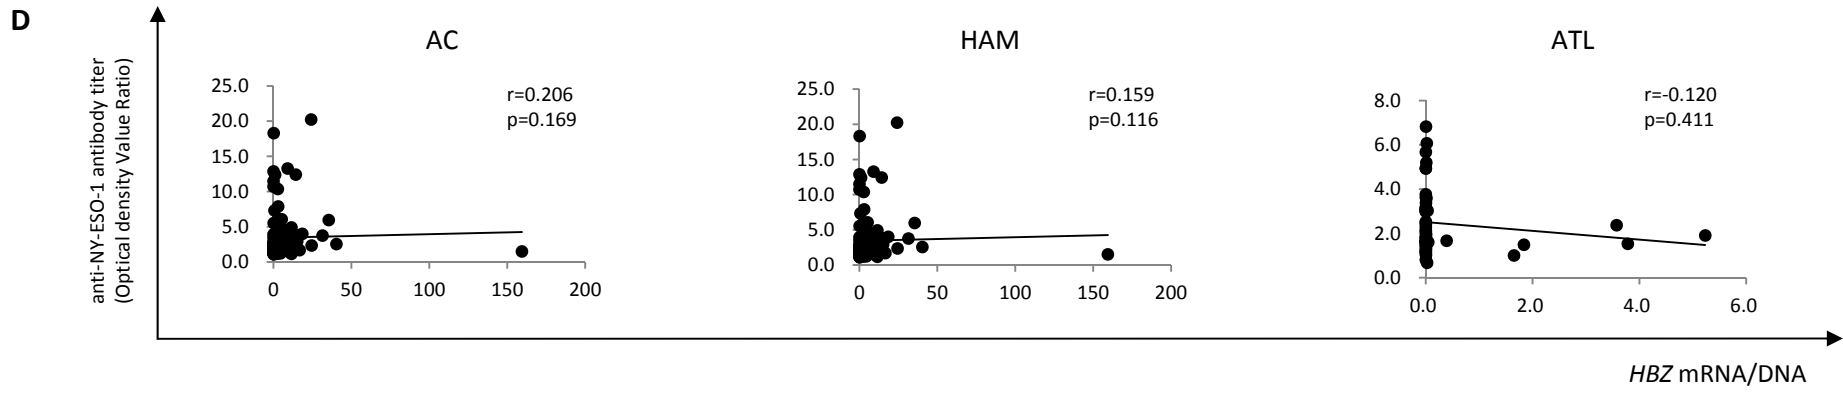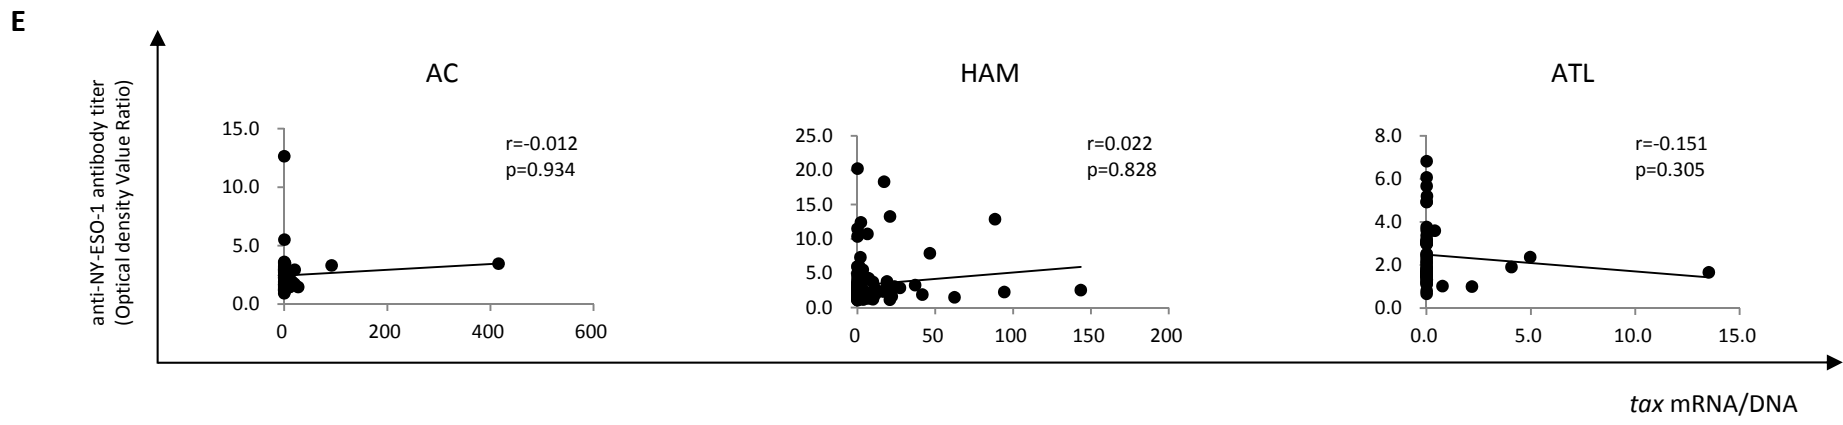

Supplementary Figure 2
